# Supplementary material for: Enhancing the triiodide reduction activity of a perovskite-based electrocatalyst for dye-sensitized solar cells through exsolved silver nanoparticles
Source: Royal Society of Chemistry journal article supplement (doi:10.1039/c9ta05005a), 2019-01-01
Supplement: c9ta05005a1.pdf [file c9ta05005a1.pdf]

## Supporting Information

### **Enhancing the triiodide reduction activity of a perovskite-based electrocatalyst for dye-sensitized solar cells through exsolved silver nanoparticles**

Meigui Xu, ‡<sup>a</sup> Wei Wang, ‡<sup>\*a</sup> Yijun Zhong,<sup>b</sup> Xiaomin Xu,<sup>b</sup> Jun Wang,<sup>a</sup> Wei Zhou<sup>a</sup> and Zongping Shao<sup>\*ab</sup>

a. State Key Laboratory of Materials-Oriented Chemical Engineering, College of Chemical Engineering, Nanjing Tech University, Nanjing 210009, China

E-mail: wangwei@njtech.edu.cn (W. Wang), shaozp@njtech.edu.cn (Z. Shao).

b. WA School of Mines: Minerals, Energy and Chemical Engineering (WASM-MECE), Curtin University, Perth, WA 6845, Australia.

## Supplementary Figures

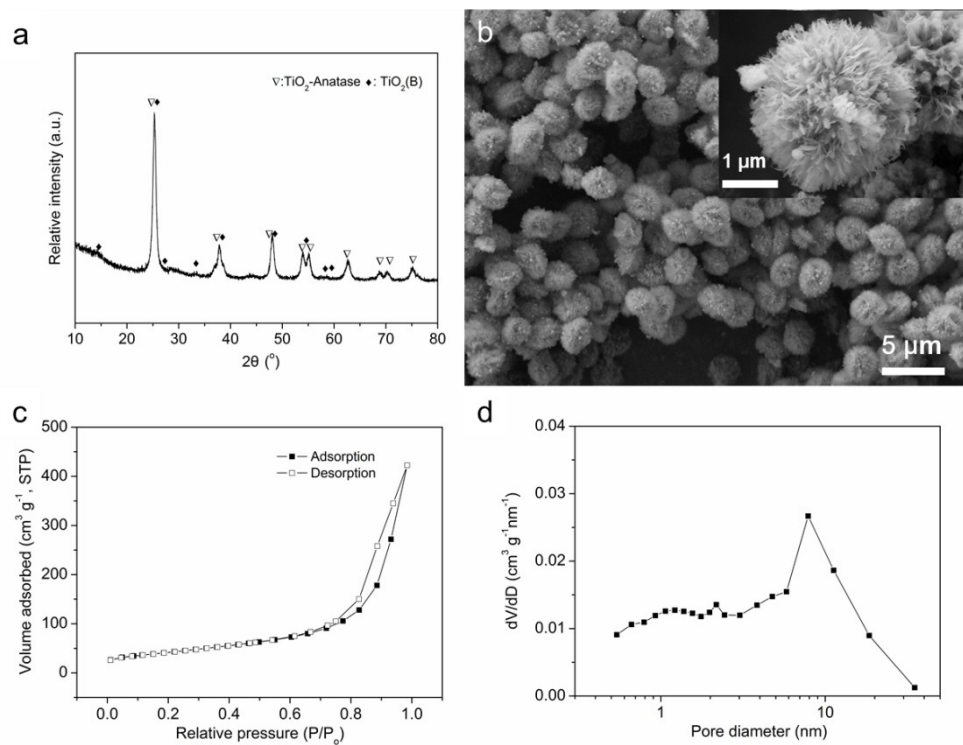

**Fig. S1** (a) XRD pattern, (b) SEM images, (c) nitrogen adsorption/desorption isotherm pattern and (d) BJH pore size distribution curve of the porous TiO<sub>2</sub> microspheres.

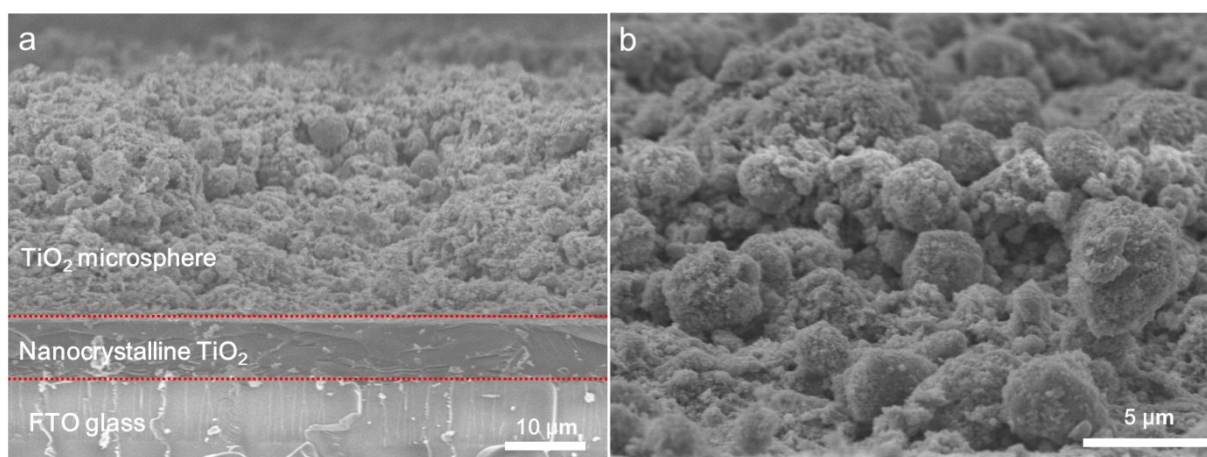

**Fig. S2** Cross-sectional SEM images of (a) the nanocrystalline TiO<sub>2</sub> layer and TiO<sub>2</sub> microsphere layer on FTO glass and (b) the TiO<sub>2</sub> microsphere layer.

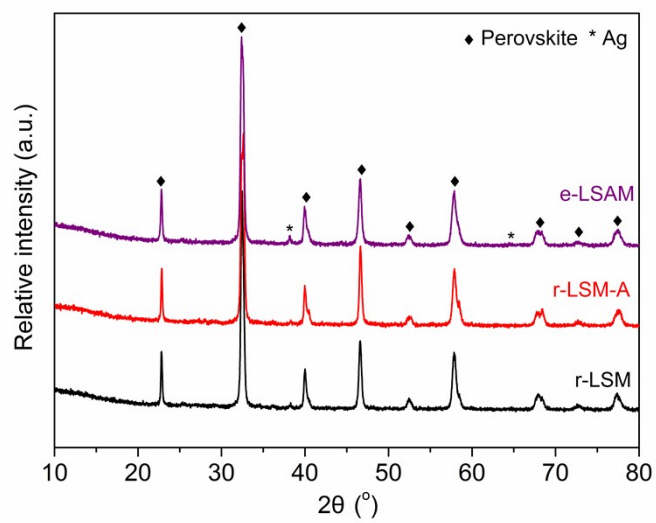

**Fig. S3** XRD patterns of r-LSM, r-LSM-A and e-LSAM.

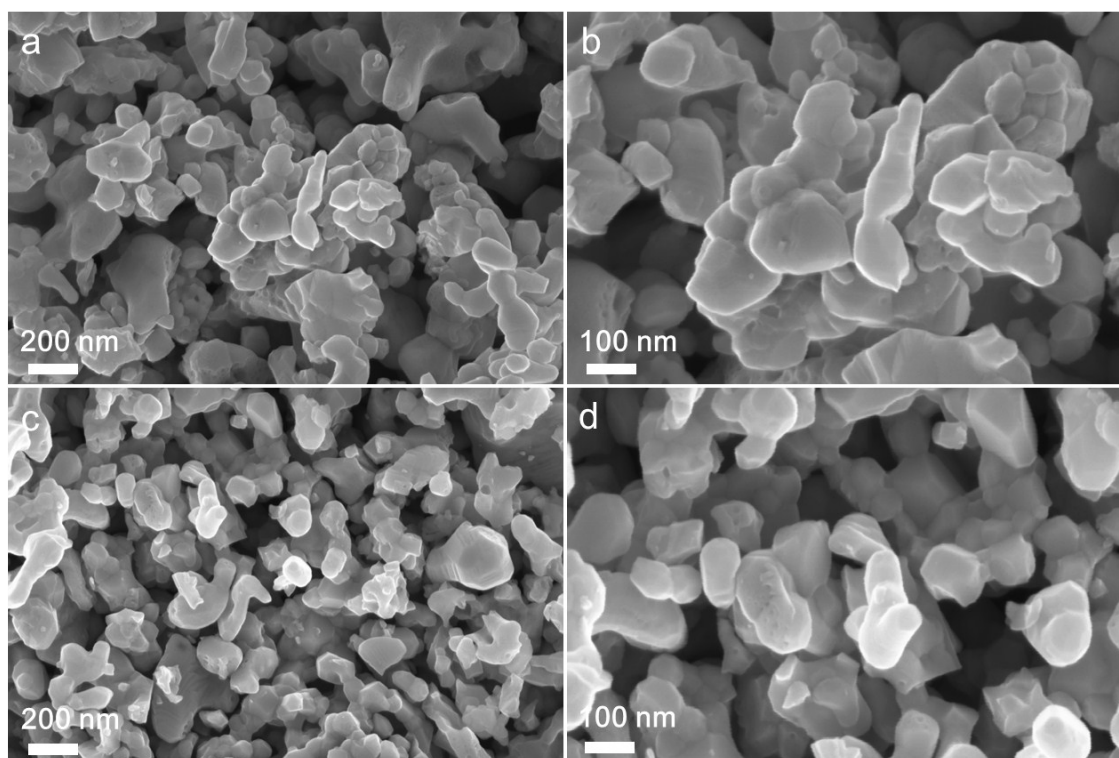

**Fig. S4** SEM images of (a, b) r-LSM and (c, d) r-LSM-A.

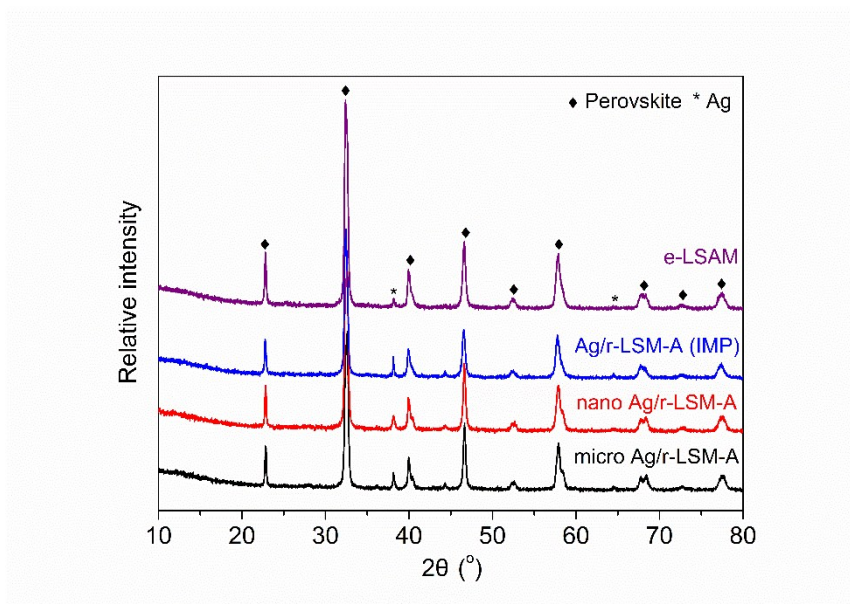

**Fig. S5** XRD patterns of micro Ag/r-LSM-A, nano Ag/r-LSM-A, Ag/r-LSM-A (IMP) and e-LSAM.

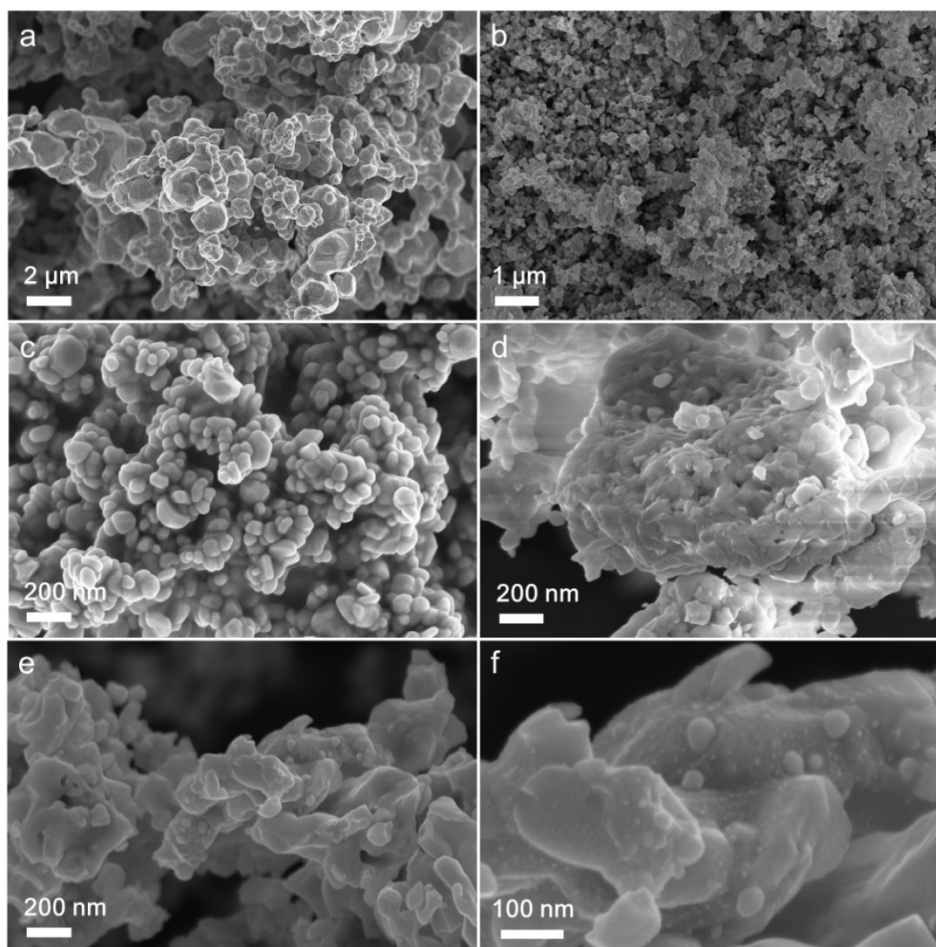

**Fig. S6** SEM images of (a) commercial micro Ag, (b) micro Ag/r-LSM-A, (c) commercial nano Ag, (d) nano Ag/r-LSM-A and (e, f) Ag/r-LSM-A (IMP).

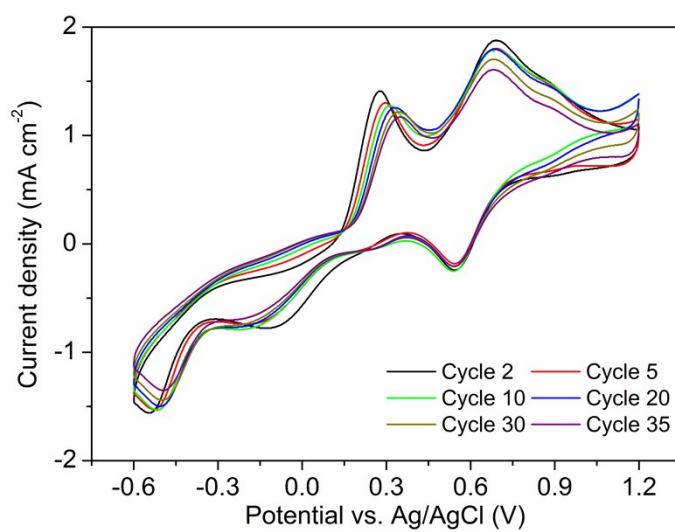

**Fig. S7** The CV curves of Pt cathode in CV stability test.

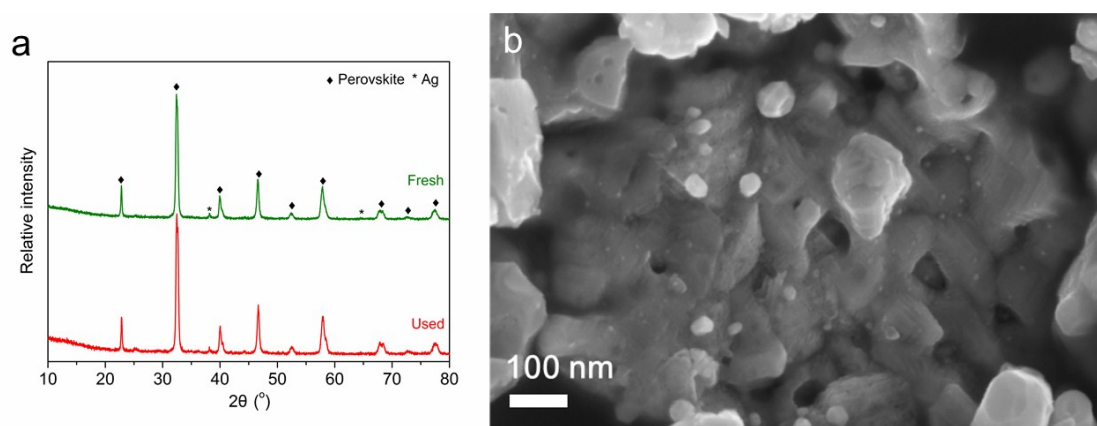

**Fig. S8** (a) XRD patterns of e-LSAM cathode before and after the test. (b) SEM image of e-LSAM cathode after the test.

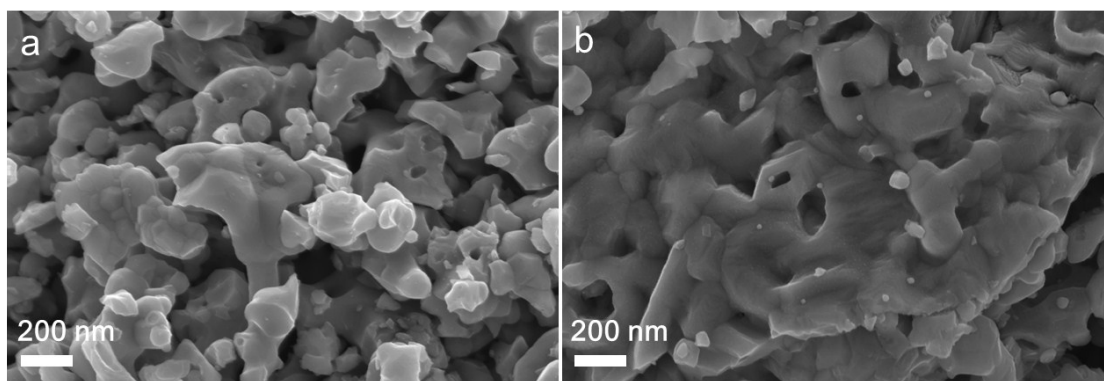

**Fig. S9** SEM images of (a) LCAM and (b) e-LCAM.

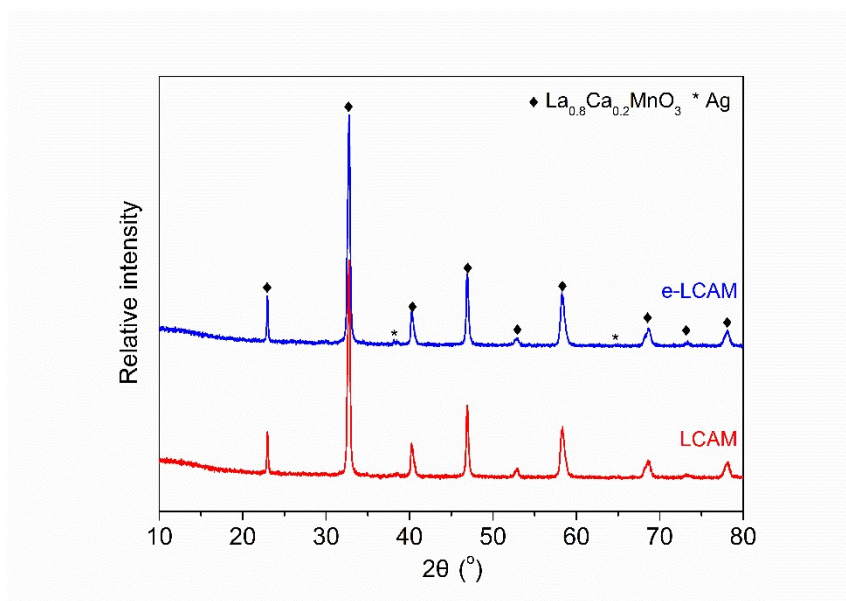

**Fig. S10** XRD patterns of LCAM and e-LCAM.

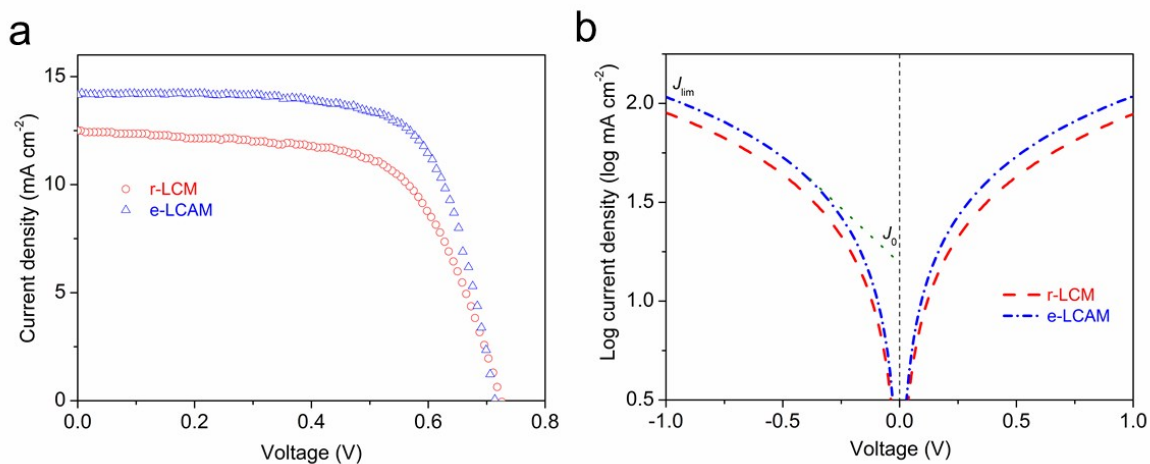

**Fig. S11** (a)  $J$ - $V$  curves of DSSCs with r-LCM and e-LCAM cathodes, TiO<sub>2</sub> microsphere photoanode, N719 dye under simulated sunlight irradiation. (b) Tafel curves of r-LCM and e-LCAM samples.

## Supplementary Tables

**Table S1**  $J$ - $V$  characteristics of DSSCs with r-LSM, r-LSM-A, e-LSAM and Pt cathodes and TiO<sub>2</sub> microsphere photoanode and N719 dye under simulated sunlight irradiation.

| Cathodes | $J_{SC}$ (mA cm <sup>-2</sup> ) | $V_{OC}$ (V) | FF    | Maximum PCE (%) | Average PCE obtained by at least 5 cells (%) |
|----------|---------------------------------|--------------|-------|-----------------|----------------------------------------------|
| r-LSM    | 12.6                            | 0.709        | 0.581 | 5.20            | 5.04                                         |
| r-LSM-A  | 13.7                            | 0.732        | 0.597 | 5.99            | 5.97                                         |
| e-LSAM   | 16.1                            | 0.713        | 0.713 | 8.16            | 8.08                                         |
| Pt       | 18.6                            | 0.700        | 0.676 | 8.80            | 8.72                                         |

**Table S2** Some important parameters obtained from the Tafel curves of r-LSM, r-LSM-A, e-LSAM and Pt in I<sub>3</sub><sup>-</sup>/I<sup>-</sup>-based electrolyte.

| Cathodes | $J_0$ (mA cm <sup>-2</sup> ) | $R_{ct-Tafel}$ (Ω cm <sup>2</sup> ) | $J_{lim}$ (mA cm <sup>-2</sup> ) | $D$ (10 <sup>-5</sup> cm <sup>2</sup> s <sup>-1</sup> ) |
|----------|------------------------------|-------------------------------------|----------------------------------|---------------------------------------------------------|
| r-LSM    | 10.2                         | 1.25                                | 82.8                             | 2.07                                                    |
| r-LSM-A  | 12.4                         | 1.02                                | 93.5                             | 2.34                                                    |
| e-LSAM   | 17.4                         | 0.73                                | 123.4                            | 3.08                                                    |
| Pt       | 19.9                         | 0.64                                | 134.5                            | 3.36                                                    |

**Table S3**  $J$ - $V$  characteristics of DSSCs with micro Ag/r-LSM-A, nano Ag/r-LSM-A, Ag/LSM-A-IMP and e-LSAM cathodes and TiO<sub>2</sub> microsphere photoanode and N719 dye under simulated sunlight irradiation.

| Cathodes         | J <sub>SC</sub> (mA cm <sup>-2</sup> ) | V <sub>OC</sub> (V) | FF    | Maximum PCE (%) | Average PCE obtained by at least 5 cells (%) |
|------------------|----------------------------------------|---------------------|-------|-----------------|----------------------------------------------|
| micro Ag/r-LSM-A | 14.1                                   | 0.702               | 0.639 | 6.32            | 6.28                                         |
| nano Ag/r-LSM-A  | 13.7                                   | 0.731               | 0.670 | 6.75            | 6.61                                         |
| Ag/r-LSM-A (IMP) | 14.3                                   | 0.729               | 0.699 | 7.29            | 7.21                                         |
| e-LSAM           | 16.1                                   | 0.713               | 0.713 | 8.16            | 8.08                                         |

**Table S4** Some important parameters obtained from the Tafel curves of r-LSM, r-LCM, e-LSAM and e-LCAM in I<sub>3</sub><sup>-</sup>/I<sup>-</sup>-based electrolyte.

| Cathodes         | J <sub>0</sub> (mA cm <sup>-2</sup> ) | R <sub>ct-Tafel</sub> (Ω cm <sup>2</sup> ) | J <sub>lim</sub> (mA cm <sup>-2</sup> ) | D (10 <sup>-5</sup> cm <sup>2</sup> s <sup>-1</sup> ) |
|------------------|---------------------------------------|--------------------------------------------|-----------------------------------------|-------------------------------------------------------|
| micro Ag/r-LSM-A | 12.6                                  | 1.01                                       | 99.7                                    | 2.49                                                  |
| nano Ag/r-LSM-A  | 14.1                                  | 0.90                                       | 105.6                                   | 2.63                                                  |
| Ag/r-LSM-A (IMP) | 15.8                                  | 0.80                                       | 112.9                                   | 2.82                                                  |
| e-LSAM           | 17.4                                  | 0.73                                       | 123.4                                   | 3.08                                                  |

**Table S5**  $J$ - $V$  characteristics of DSSCs with LSAM/MWCNTs, e-LSAM/MWCNTs and Pt cathodes and TiO<sub>2</sub> microsphere photoanode and N719 dye under simulated sunlight irradiation.

| Cathodes      | J <sub>SC</sub> (mA cm <sup>-2</sup> ) | V <sub>OC</sub> (V) | FF    | Maximum PCE (%) | Average PCE obtained by at least 5 cells (%) |
|---------------|----------------------------------------|---------------------|-------|-----------------|----------------------------------------------|
| LSAM/MWCNTs   | 15.7                                   | 0.765               | 0.700 | 8.41            | 8.27                                         |
| e-LSAM/MWCNTs | 18.7                                   | 0.769               | 0.740 | 10.7            | 10.6                                         |
| Pt            | 18.6                                   | 0.700               | 0.676 | 8.80            | 8.72                                         |



**Table S6** Some important parameters obtained from the Tafel curves and EIS spectra of LSAM/MWCNTs, e-LSAM/MWCNTs and Pt cathodes in  $I_3^-/I^-$ -based electrolyte.

| Cathodes      | $J_0$ (mA cm <sup>-2</sup> ) | $R_{ct-Tafel}$ ( $\Omega$ cm <sup>2</sup> ) | $J_{lim}$ (mA cm <sup>-2</sup> ) | $D$ ( $10^{-5}$ cm <sup>2</sup> s <sup>-1</sup> ) | $R_{ct-EIS}$ ( $\Omega$ cm <sup>2</sup> ) |
|---------------|------------------------------|---------------------------------------------|----------------------------------|---------------------------------------------------|-------------------------------------------|
| LSAM/MWCNTs   | 19.5                         | 0.65                                        | 127.7                            | 3.19                                              | 0.96                                      |
| e-LSAM/MWCNTs | 25.1                         | 0.51                                        | 162.1                            | 4.05                                              | 0.65                                      |
| Pt            | 19.9                         | 0.64                                        | 134.5                            | 3.36                                              | 0.88                                      |

**Table S7**  $J-V$  characteristics of DSSCs with e-LSAM/MWCNTs and Pt cathodes, TiO<sub>2</sub> microsphere photoanode and C101 dye under simulated sunlight irradiation.

| Cathodes      | $J_{SC}$ (mA cm <sup>-2</sup> ) | $V_{OC}$ (V) | FF    | Maximum PCE (%) | Average PCE obtained by at least 5 cells (%) |
|---------------|---------------------------------|--------------|-------|-----------------|----------------------------------------------|
| e-LSAM/MWCNTs | 20.9                            | 0.782        | 0.758 | 12.4            | 12.2                                         |
| Pt            | 20.9                            | 0.704        | 0.674 | 9.93            | 9.88                                         |

**Table S8**  $J-V$  characteristics of DSSCs with r-LCM and e-LCAM as cathodes and TiO<sub>2</sub> microsphere photoanode and N719 dye under simulated sunlight irradiation.

| Cathodes | $J_{SC}$ (mA cm <sup>-2</sup> ) | $V_{OC}$ (V) | FF    | Maximum PCE (%) | Average PCE obtained by at least 5 cells (%) |
|----------|---------------------------------|--------------|-------|-----------------|----------------------------------------------|
| r-LCM    | 12.5                            | 0.726        | 0.634 | 5.73            | 5.67                                         |
| e-LCAM   | 14.2                            | 0.714        | 0.699 | 7.09            | 6.86                                         |

**Table S9** Some important parameters obtained from the Tafel curves of r-LCM and e-LCAM in  $I_3^-/I^-$ -based electrolyte.

| Cathodes | $J_0$ (mA cm <sup>-2</sup> ) | $R_{ct-Tafel}$ ( $\Omega$ cm <sup>2</sup> ) | $J_{lim}$ (mA cm <sup>-2</sup> ) | $D$ ( $10^{-5}$ cm <sup>2</sup> s <sup>-1</sup> ) |
|----------|------------------------------|---------------------------------------------|----------------------------------|---------------------------------------------------|
| r-LCM    | 12.0                         | 1.06                                        | 89.7                             | 2.24                                              |
| e-LCAM   | 15.1                         | 0.84                                        | 107.9                            | 2.69                                              |
